# Supplementary material for: Physical and biogeochemical impacts of RCP8.5 scenario in the Peru upwelling system
Source: Copernicus journal article supplement (doi:10.5194/bg-17-3317-2020), 2020-07-01
Supplement: Supplementary file 1 [file bg-17-3317-2020-supplement.pdf]

Supplement of Biogeosciences, 17, 3317–3341, 2020  
<https://doi.org/10.5194/bg-17-3317-2020-supplement>  
© Author(s) 2020. This work is distributed under  
the Creative Commons Attribution 4.0 License.

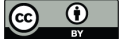

*Supplement of*

## **Physical and biogeochemical impacts of RCP8.5 scenario in the Peru upwelling system**

**Vincent Echevin et al.**

*Correspondence to:* Vincent Echevin ([vincent.echevin@ird.fr](mailto:vincent.echevin@ird.fr))

The copyright of individual parts of the supplement might differ from the CC BY 4.0 License.

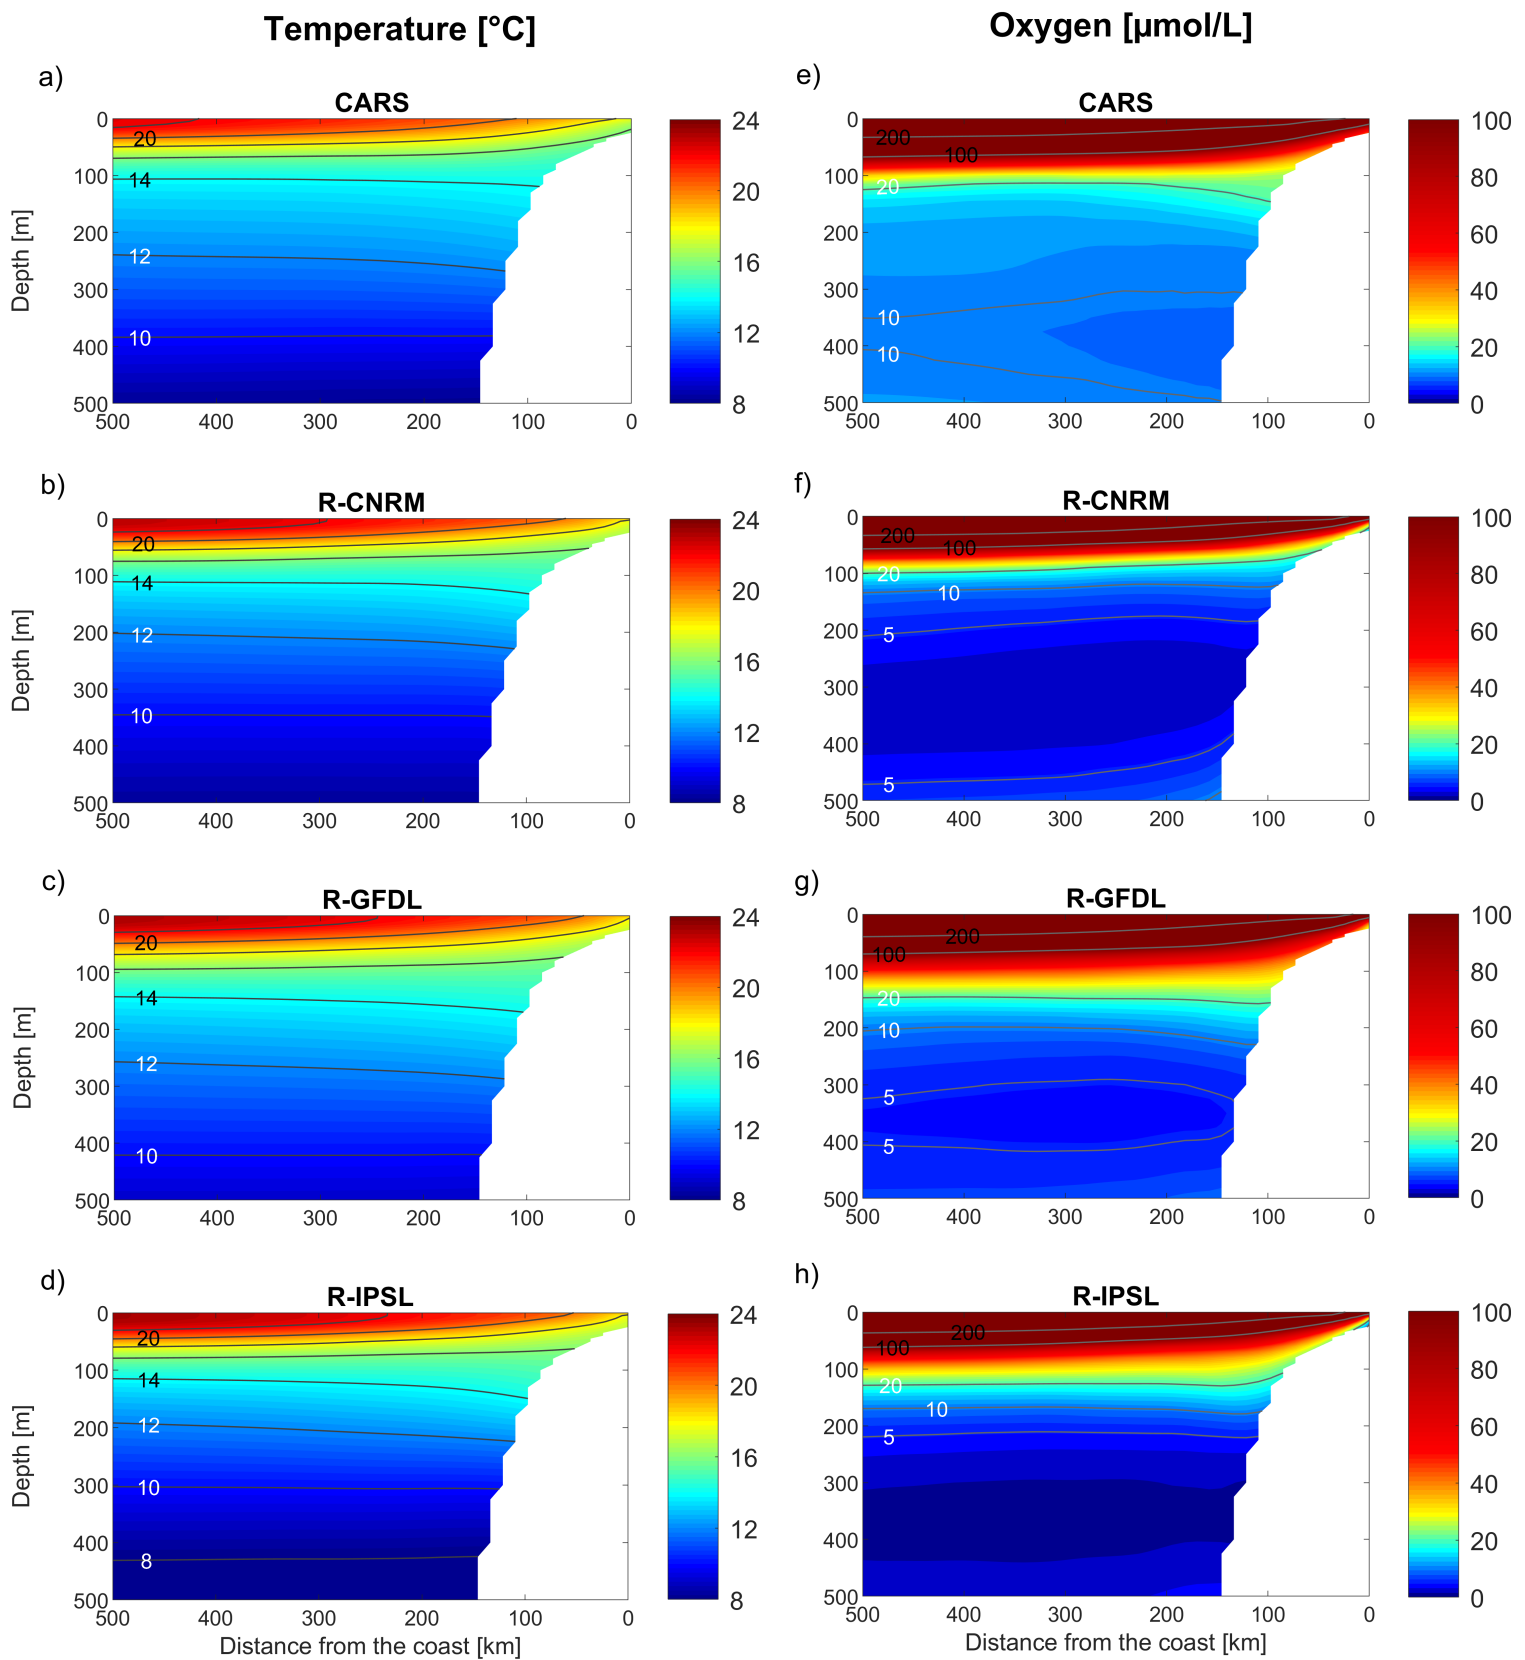

**Figure S1:** Annual vertical sections of (a),(b),(c),(d) nearshore temperature and (e),(f),(g),(h) nearshore oxygen for (a),(e) CARS, (b),(f) R-CNRM, (c),(g) R-GFDL and (d),(h) R-IPSL. They are alongshore averaged between  $7^{\circ}\text{S}$  and  $13^{\circ}\text{S}$ , and from 2006 to 2015.

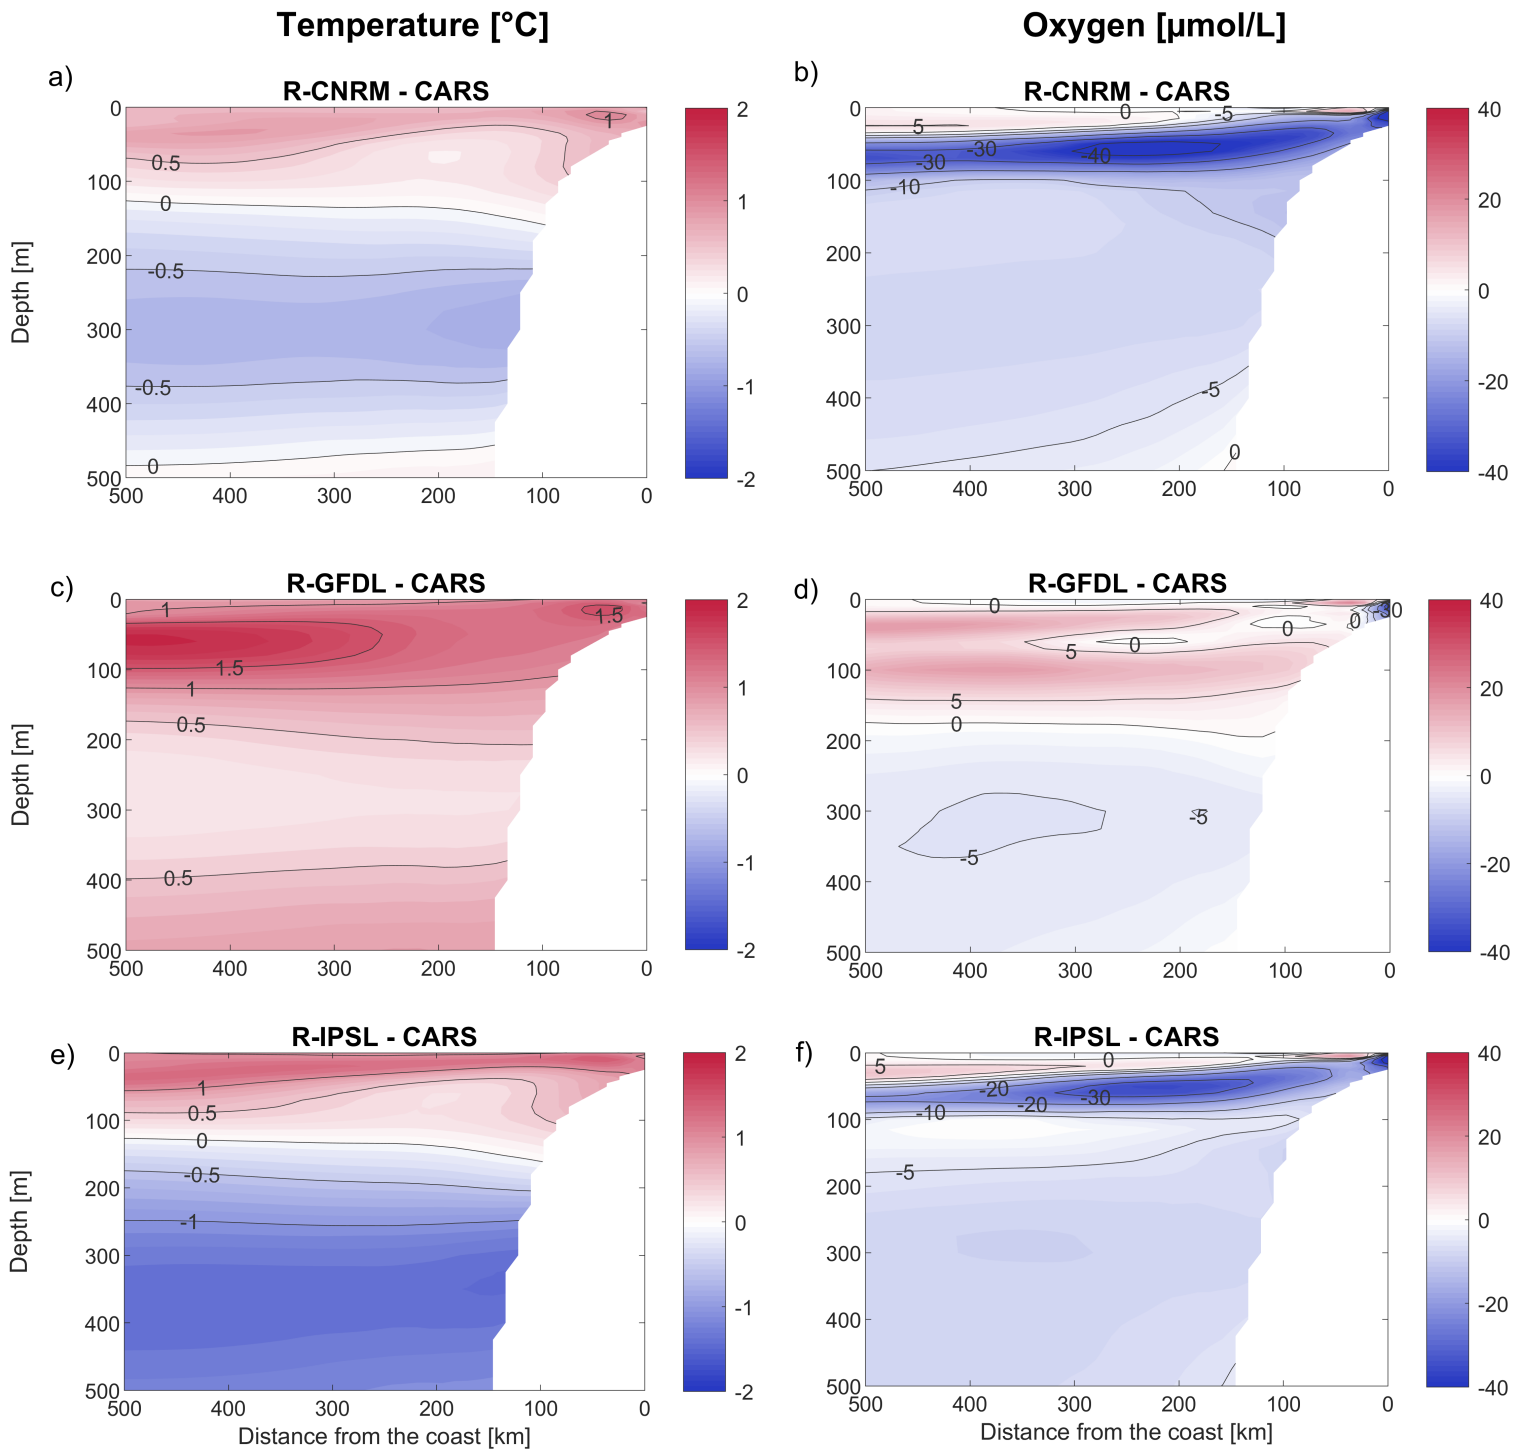

**Figure S2:** Annual vertical sections of bias of (a),(b),(c),(d) nearshore temperature and (e),(f),(g),(h) nearshore oxygen. The differences are calculated between (a),(d) R-CNRM and CARS, (b),(e) R-GFDL and CARS and (c),(f) R-IPSL and CARS. They are alongshore averaged between 7°S and 13°S, and from 2006 to 2015.
